# Supplementary material for: Gravitational collapse of colloidal gels: non-equilibrium phase separation driven by osmotic pressure
Source: Royal Society of Chemistry journal article supplement (doi:10.1039/c8sm00002f), 2018-01-01
Supplement: c8sm00002f1.zip [file c8sm00002f1.zip]

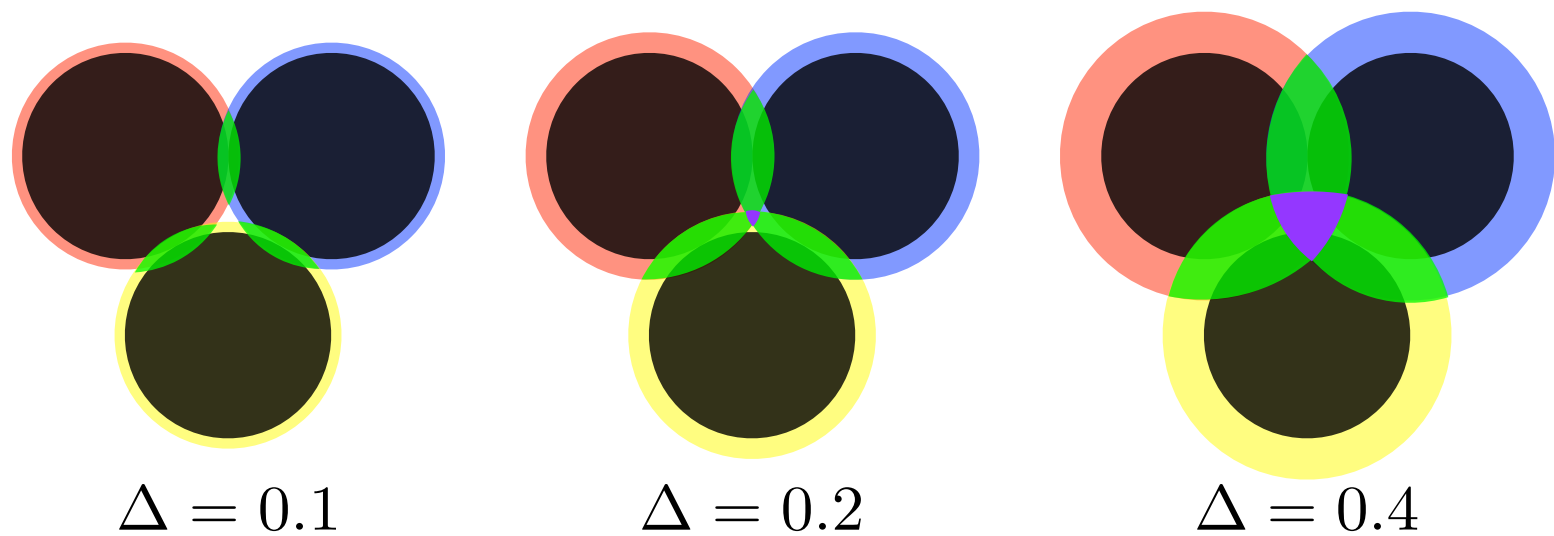

$$\Delta = \frac{\text{size of depletant}}{\text{size of polymer}}$$

- Overlap volume
- Overlap of overlaps (overcounted) volume
