# Supplementary figures and images for: Gravitational collapse of colloidal gels: non-equilibrium phase separation driven by osmotic pressure
Source: Royal Society of Chemistry journal article supplement (doi:10.1039/c8sm00002f), 2018-01-01

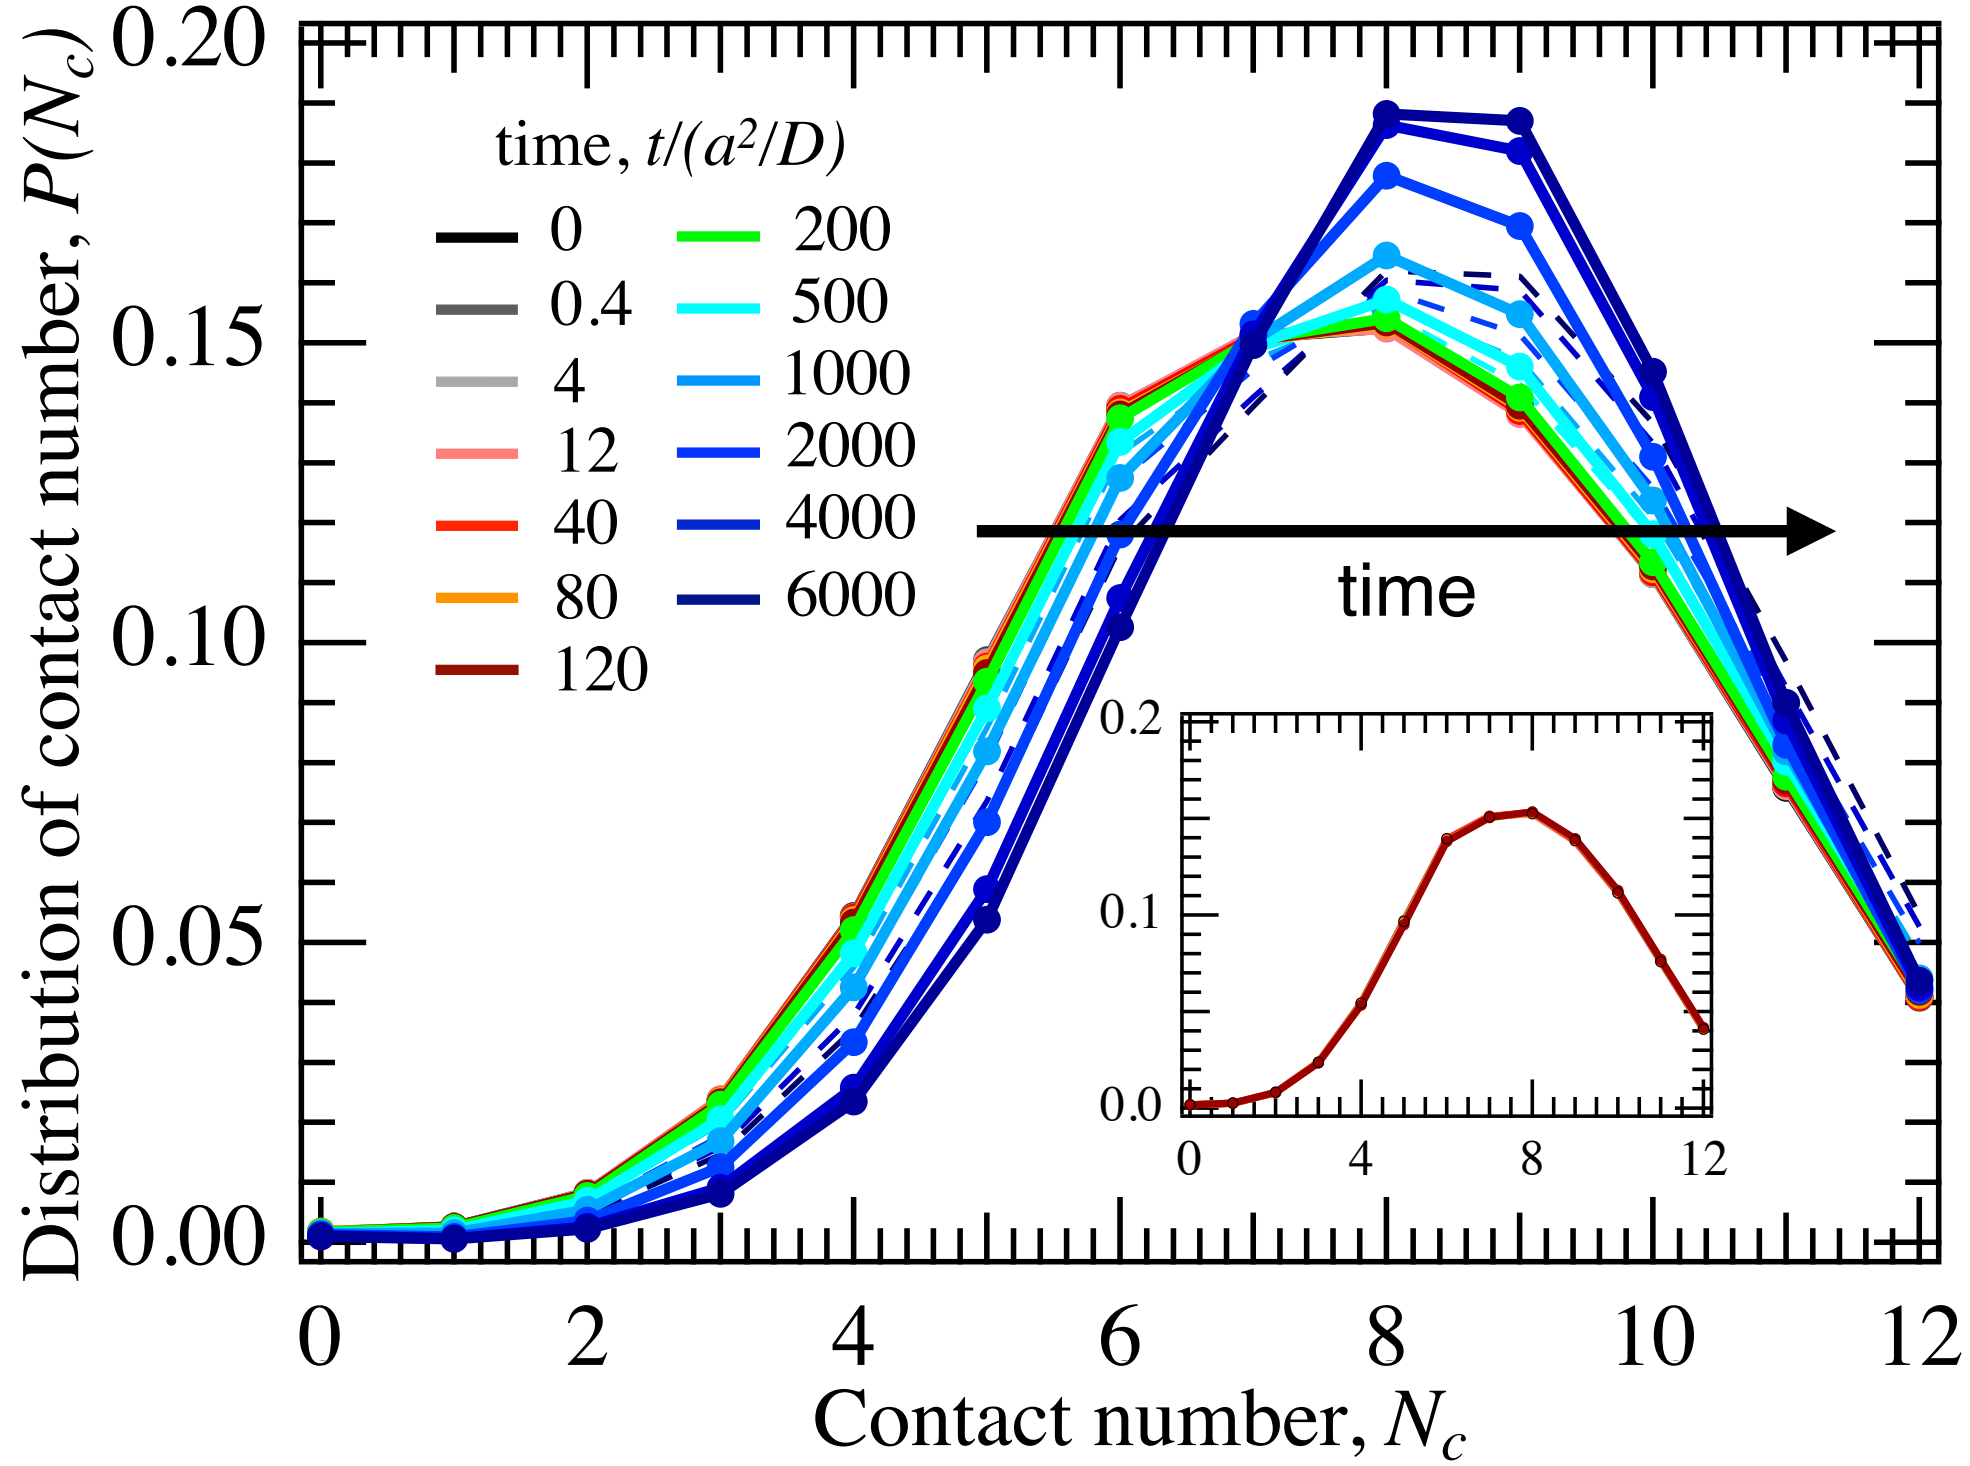

Supplement: c8sm00002f1.zip [file c8sm00002f1.zip]

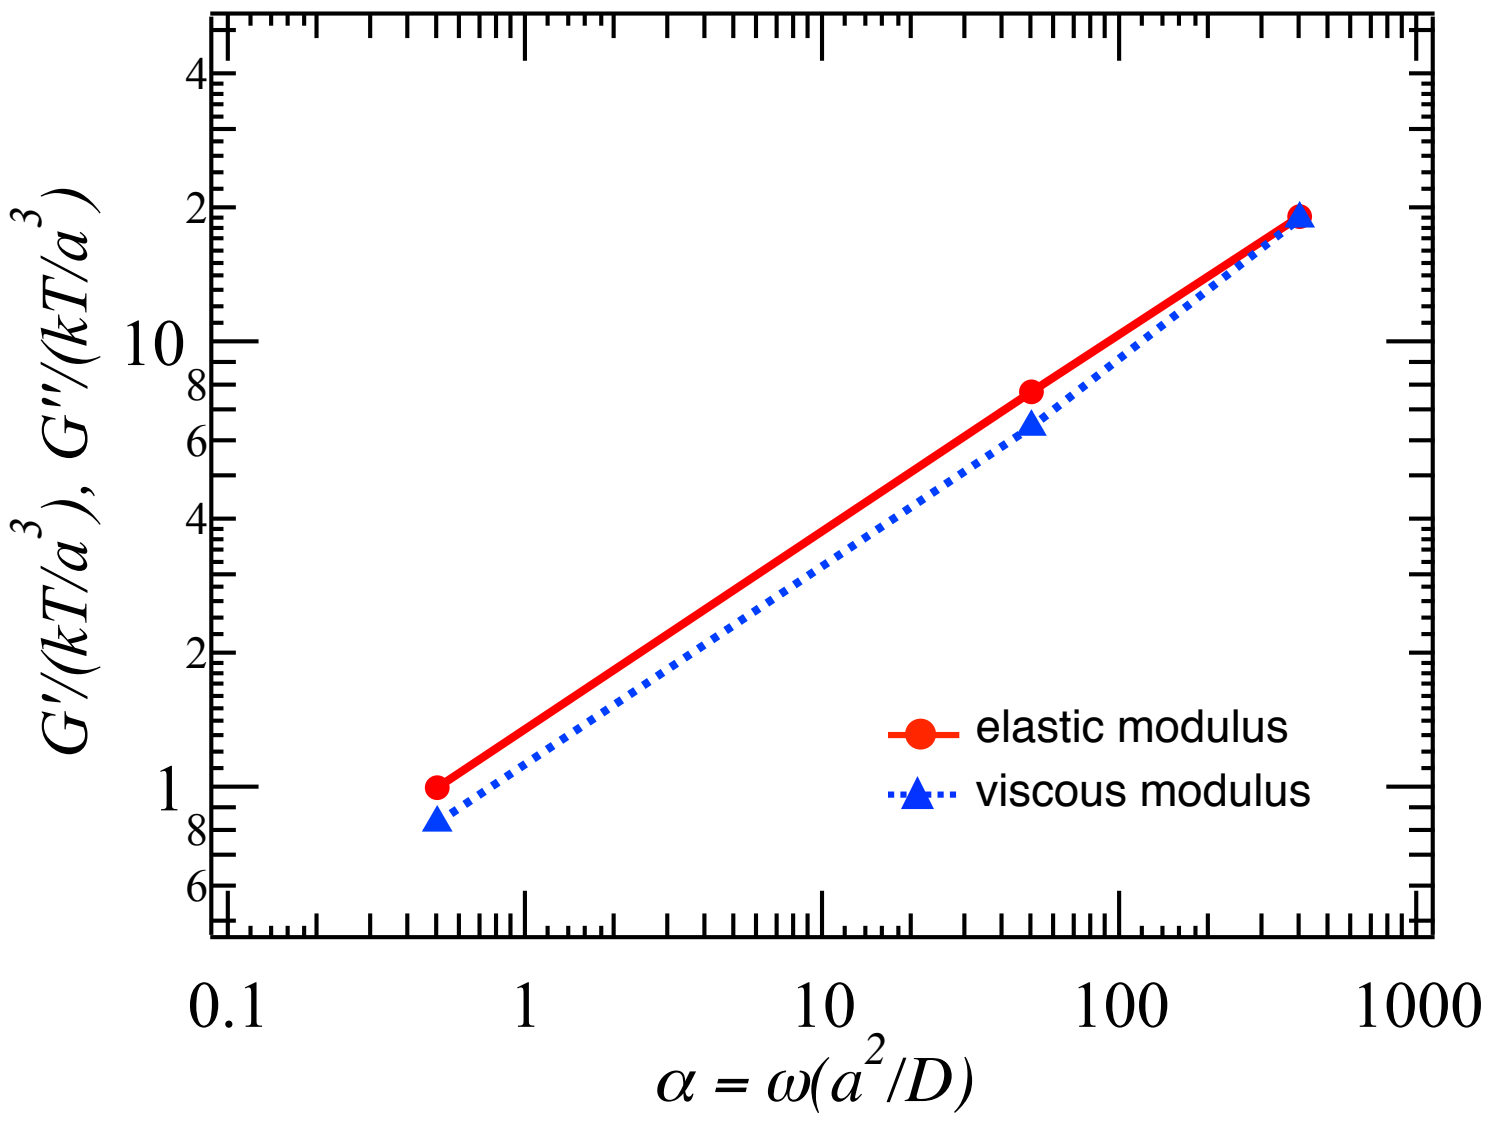

Supplement: c8sm00002f1.zip [file c8sm00002f1.zip]

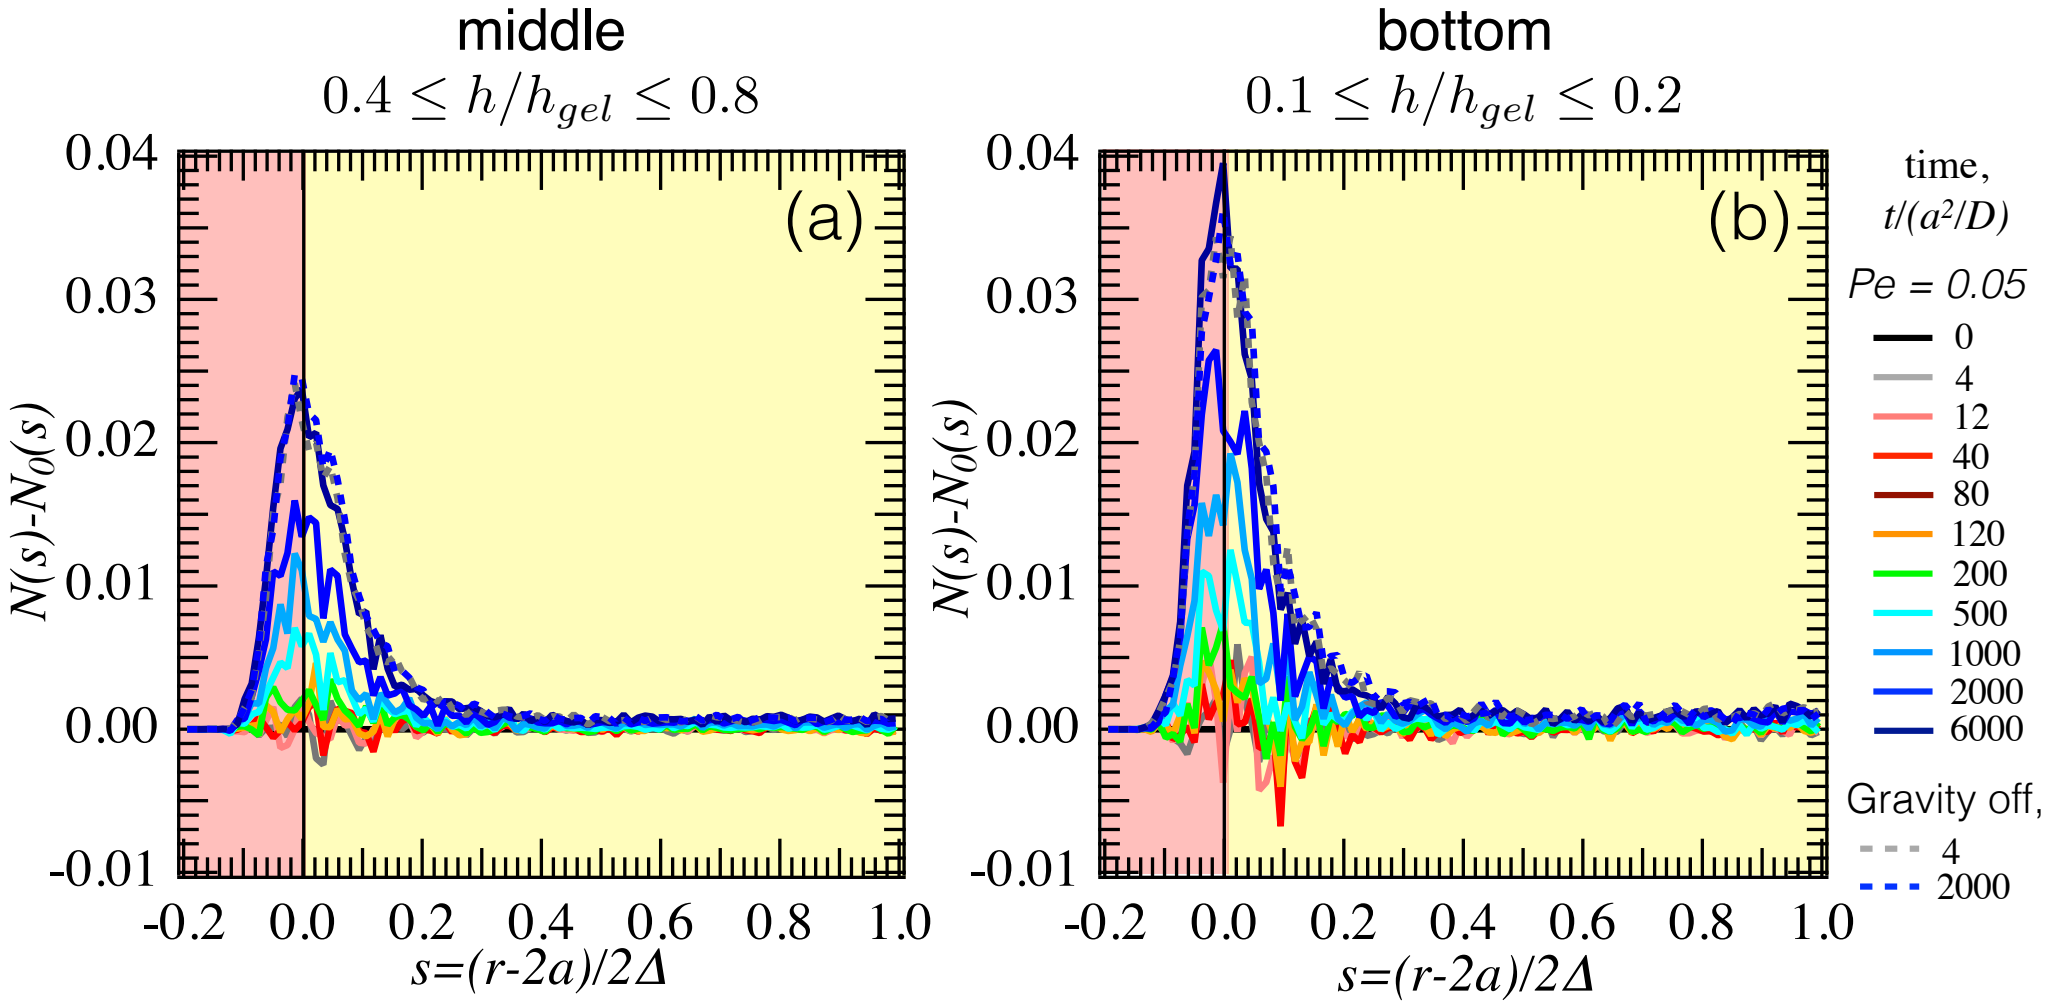

Supplement: c8sm00002f1.zip [file c8sm00002f1.zip]

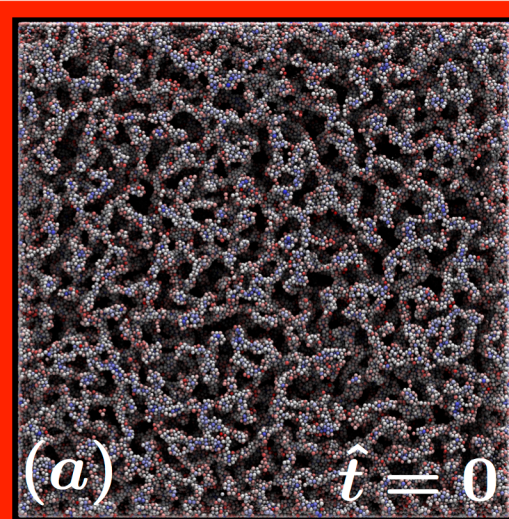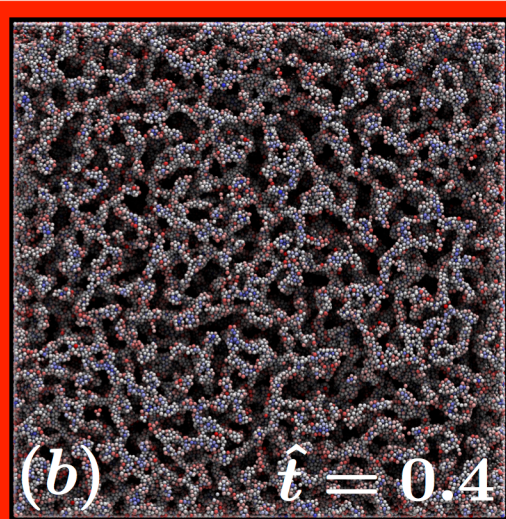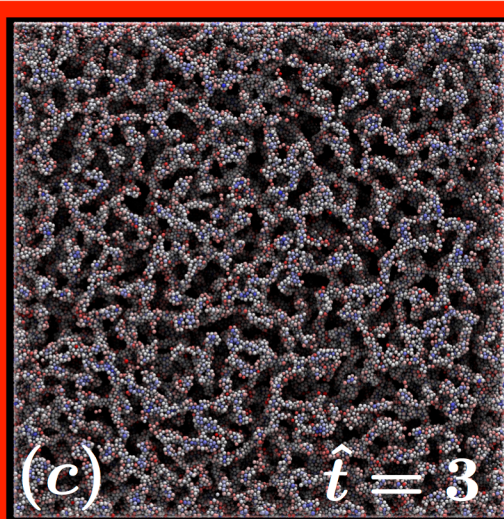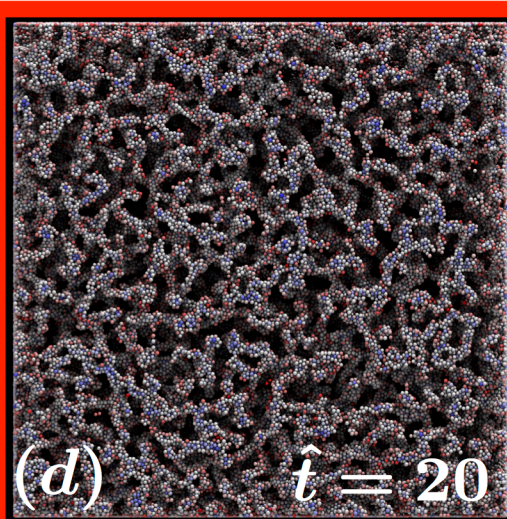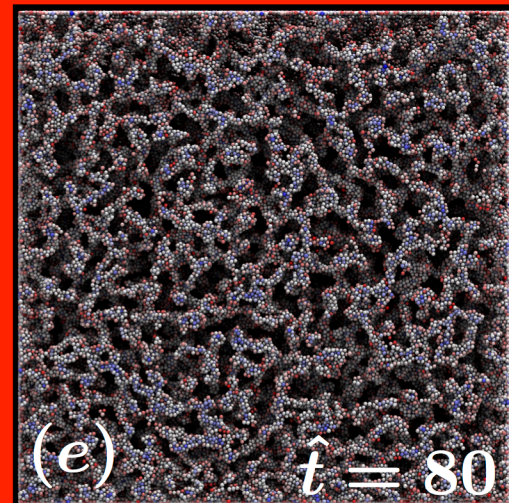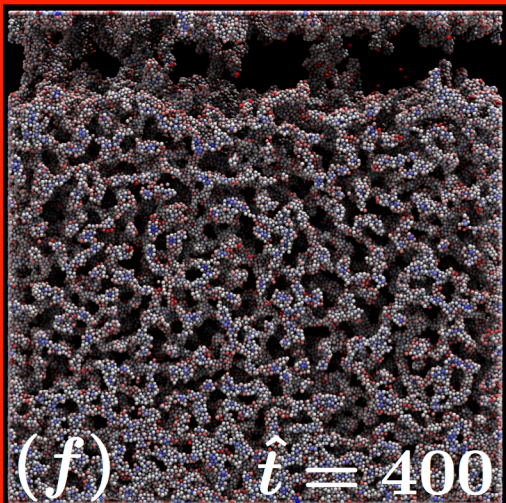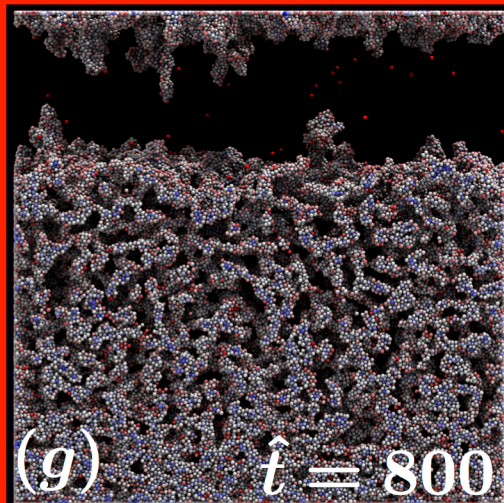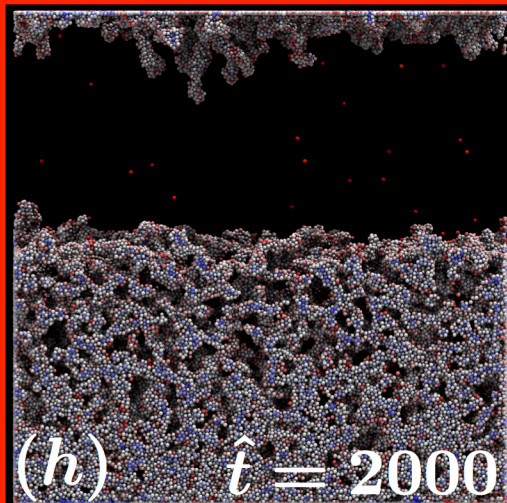

Supplement: c8sm00002f1.zip [file c8sm00002f1.zip]

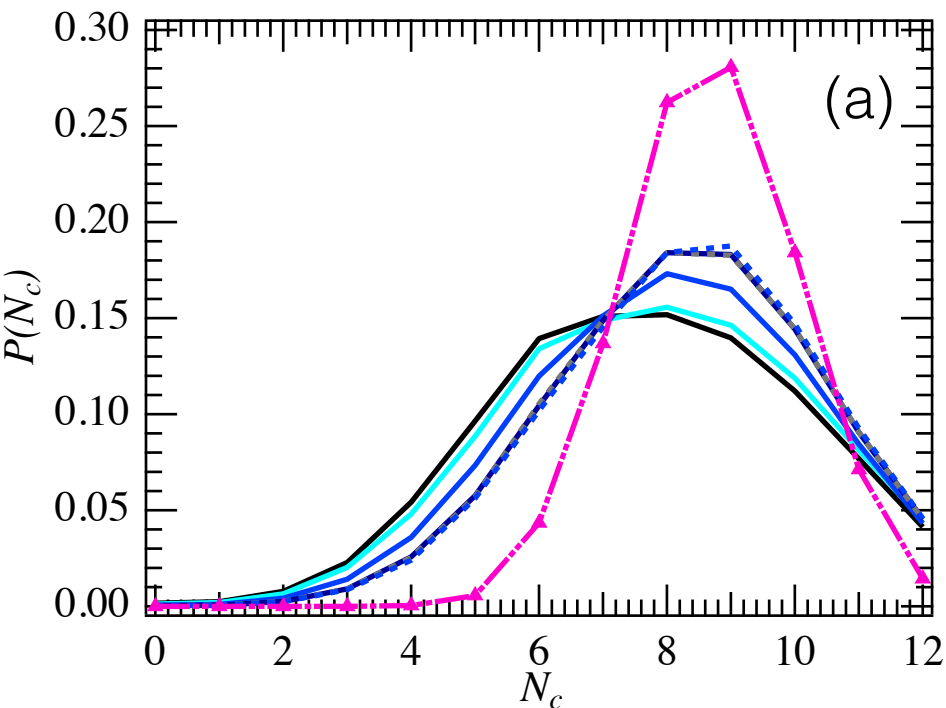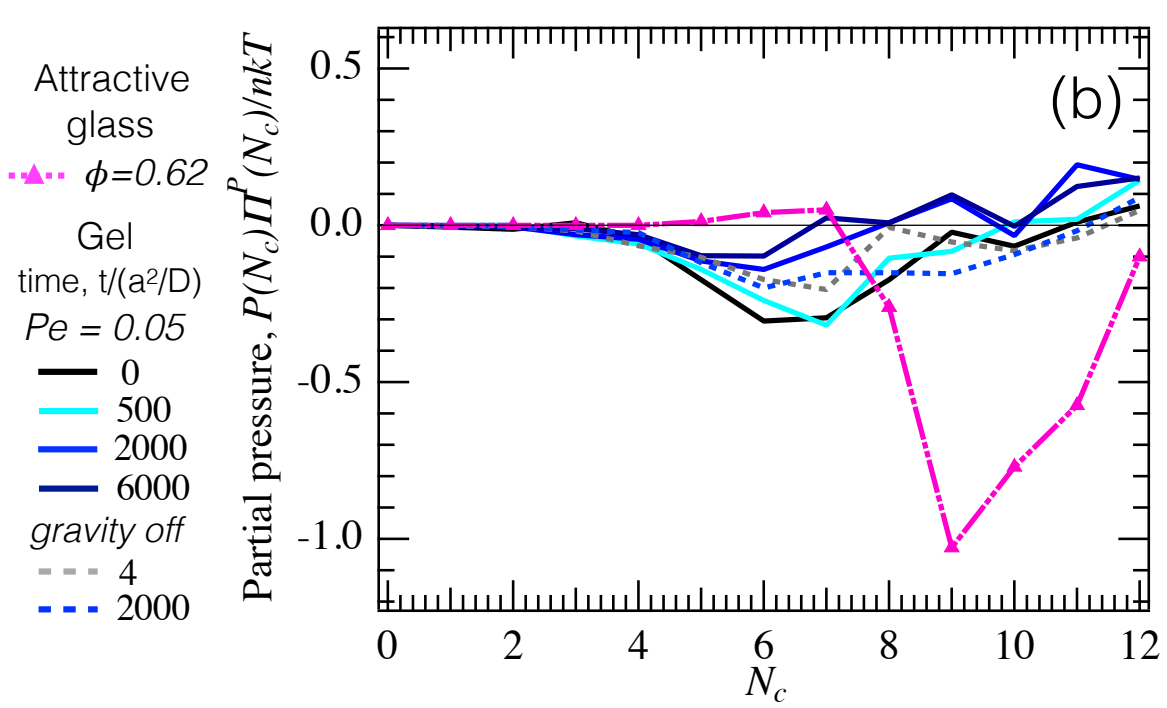

Supplement: c8sm00002f1.zip [file c8sm00002f1.zip]

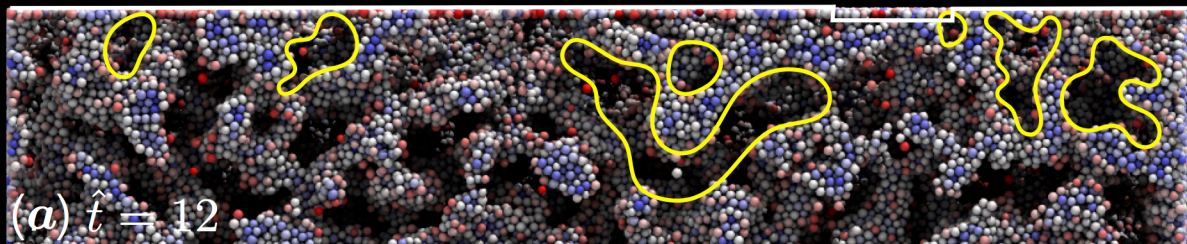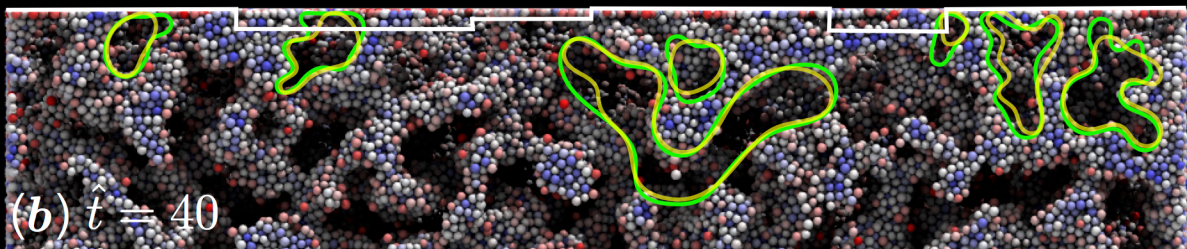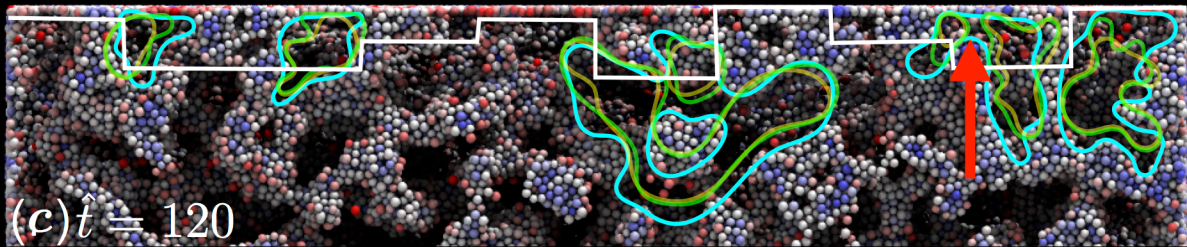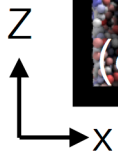

Supplement: c8sm00002f1.zip [file c8sm00002f1.zip]

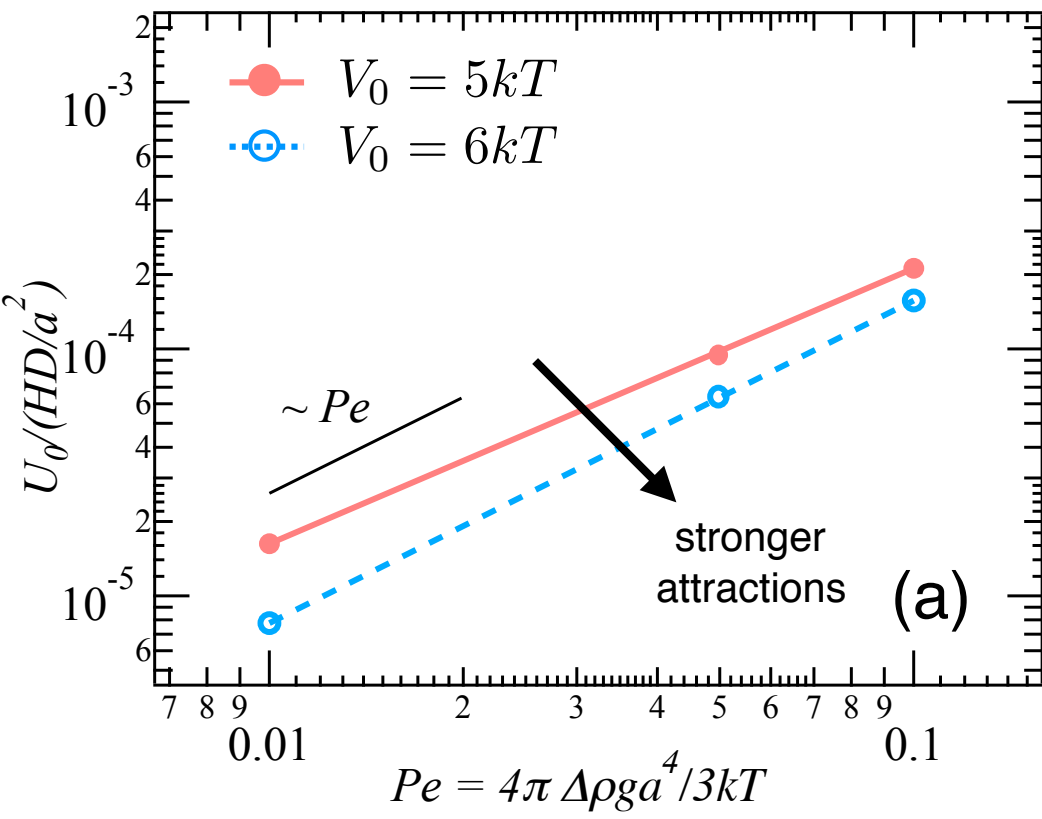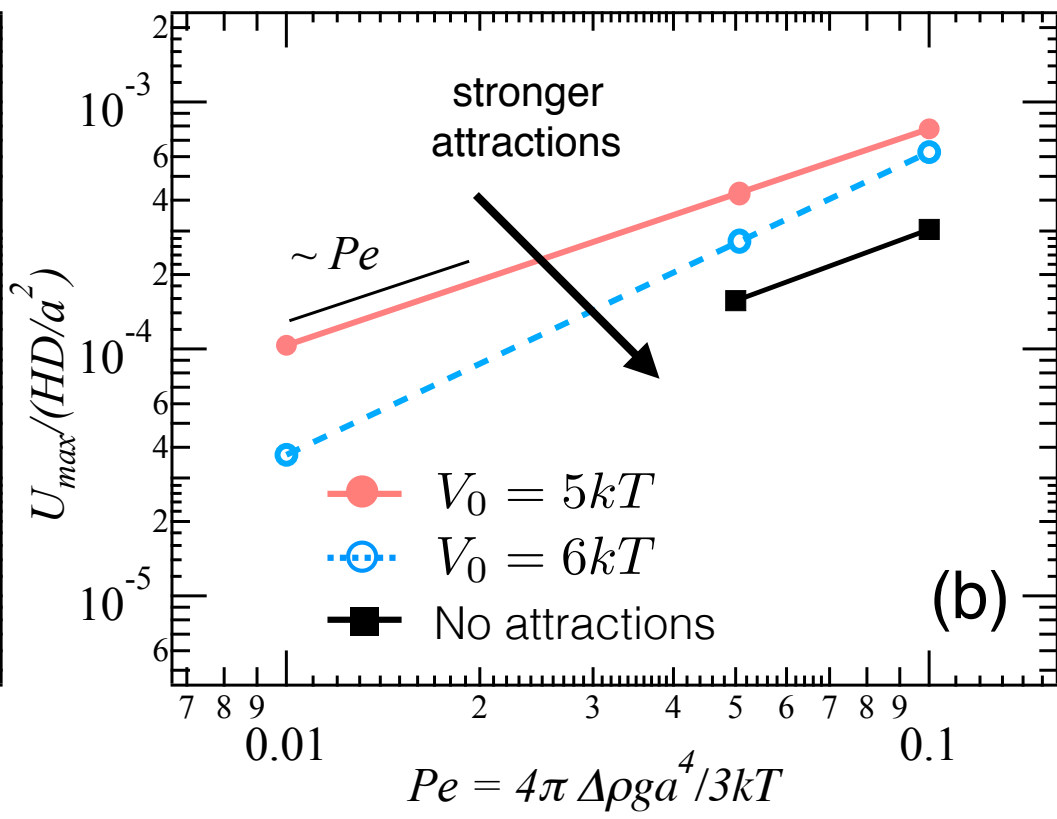

Supplement: c8sm00002f1.zip [file c8sm00002f1.zip]

TOP

BOTTOM

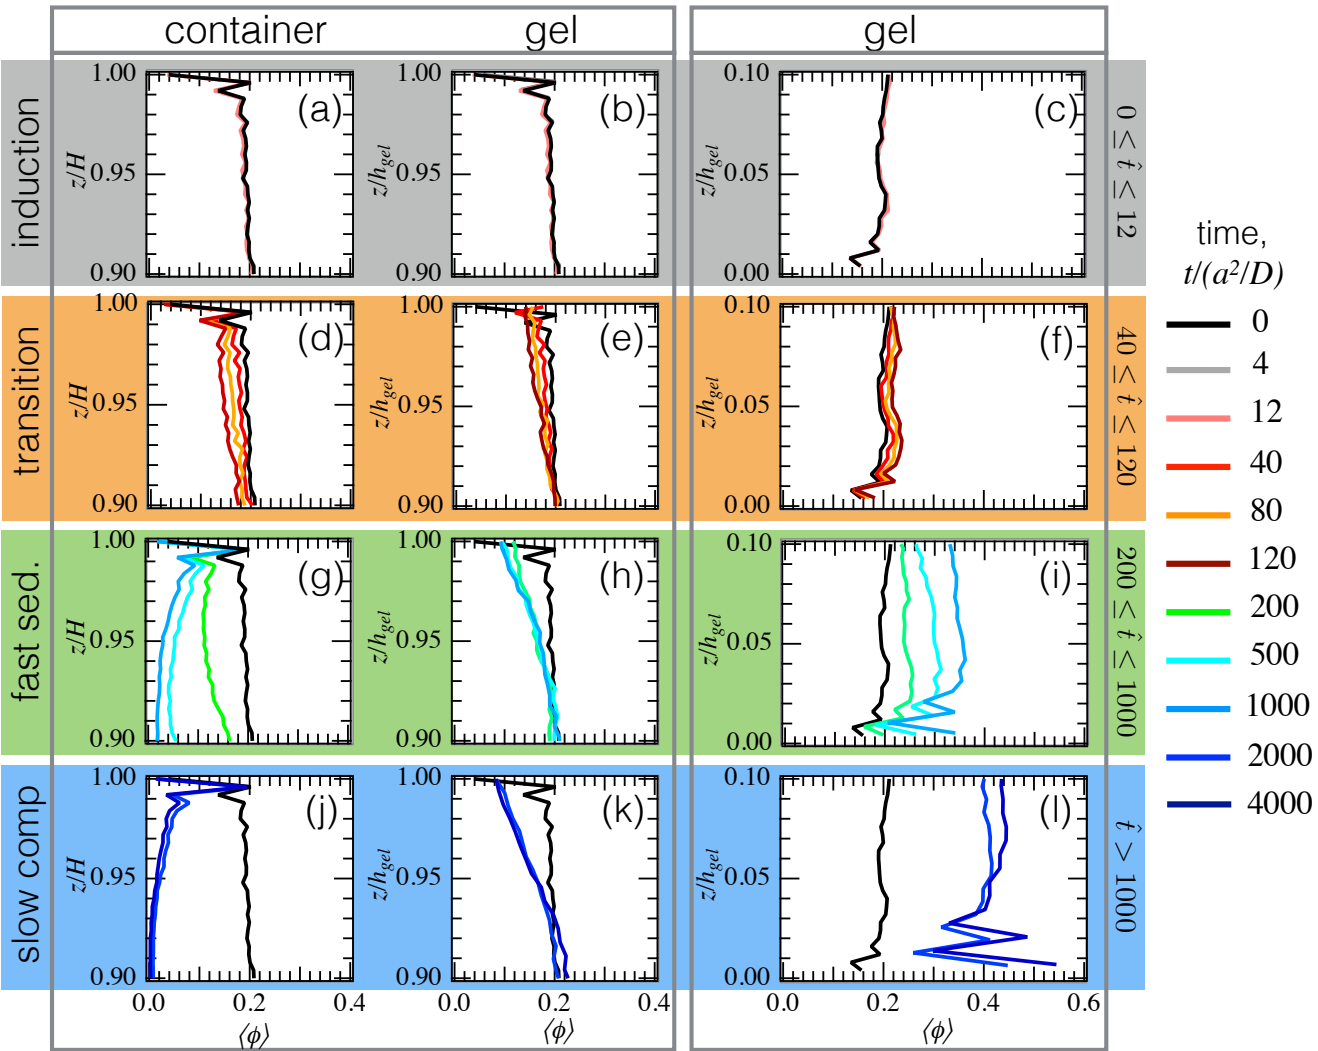

Supplement: c8sm00002f1.zip [file c8sm00002f1.zip]

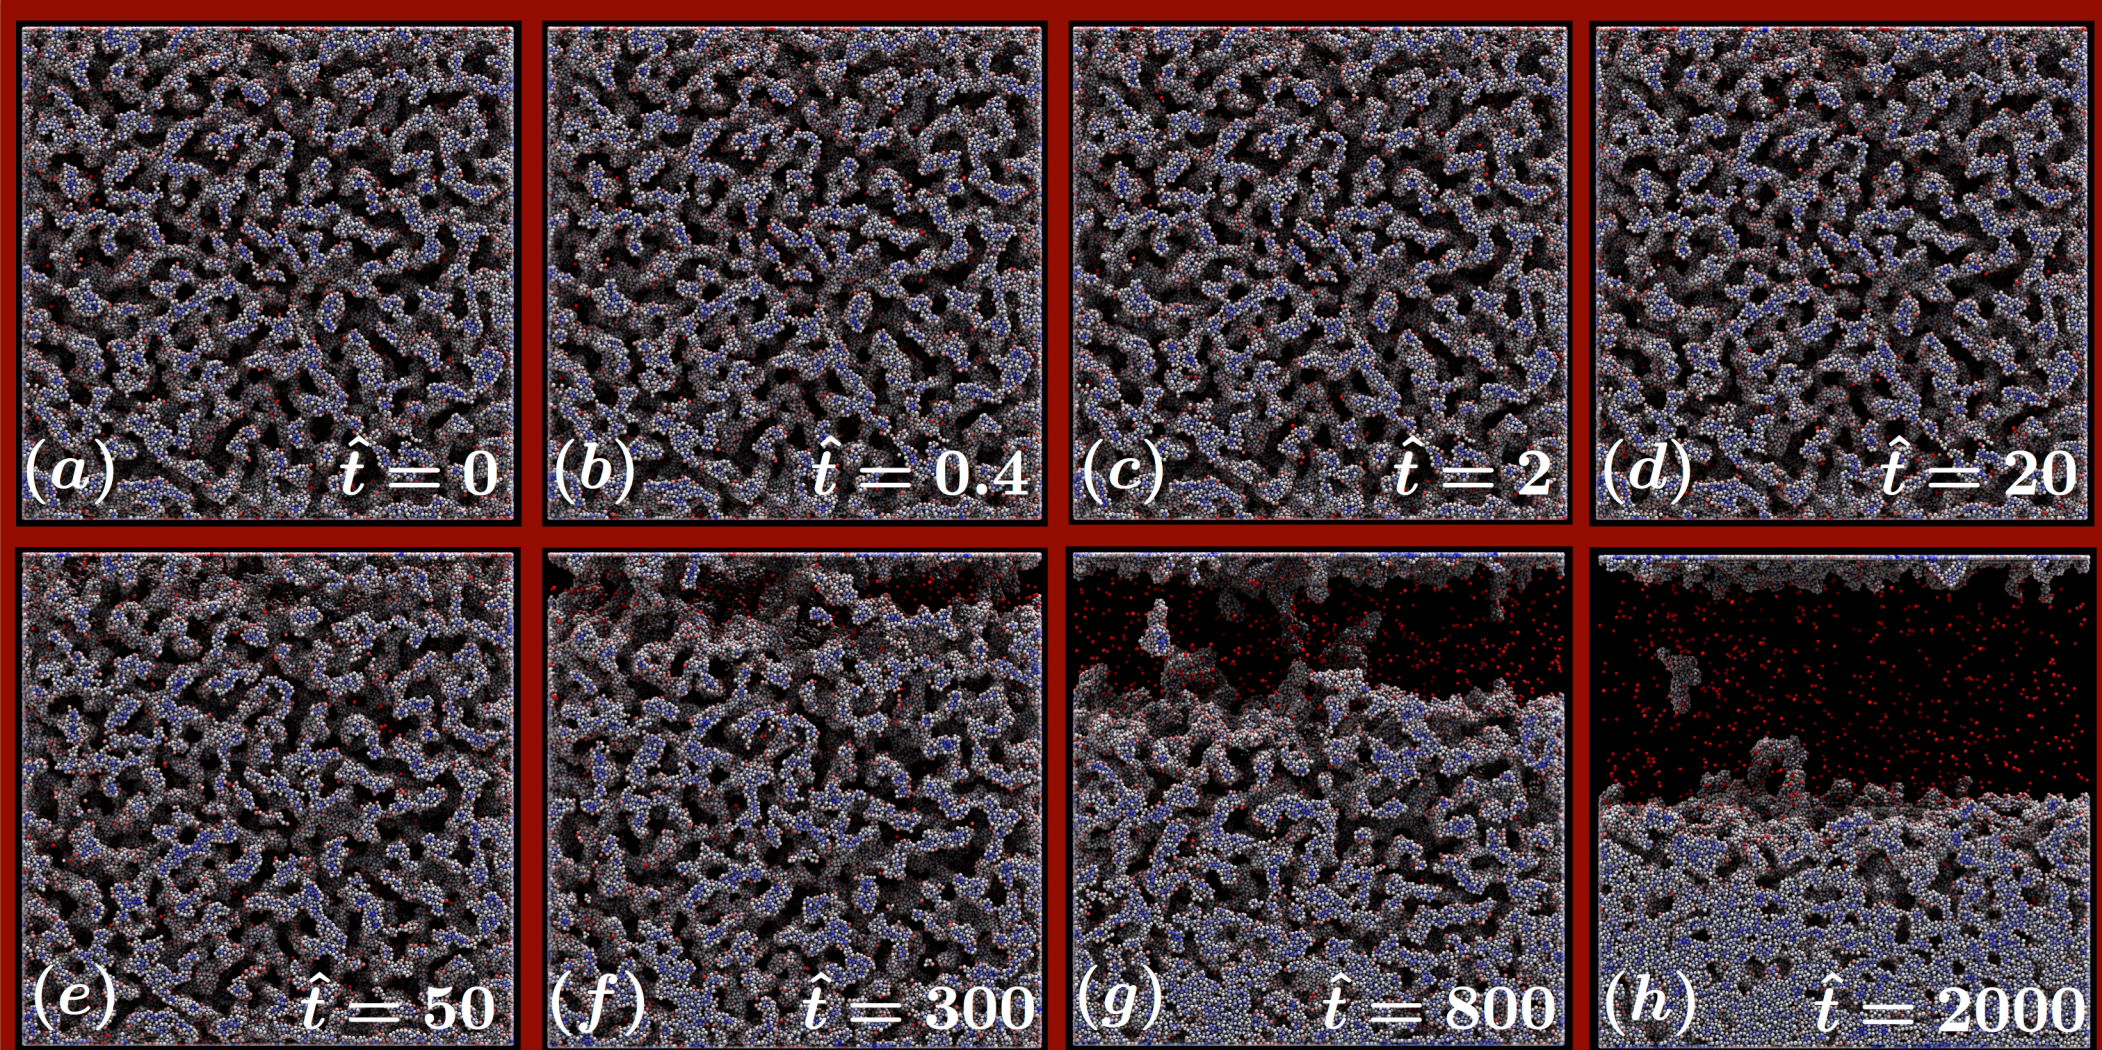

Supplement: c8sm00002f1.zip [file c8sm00002f1.zip]

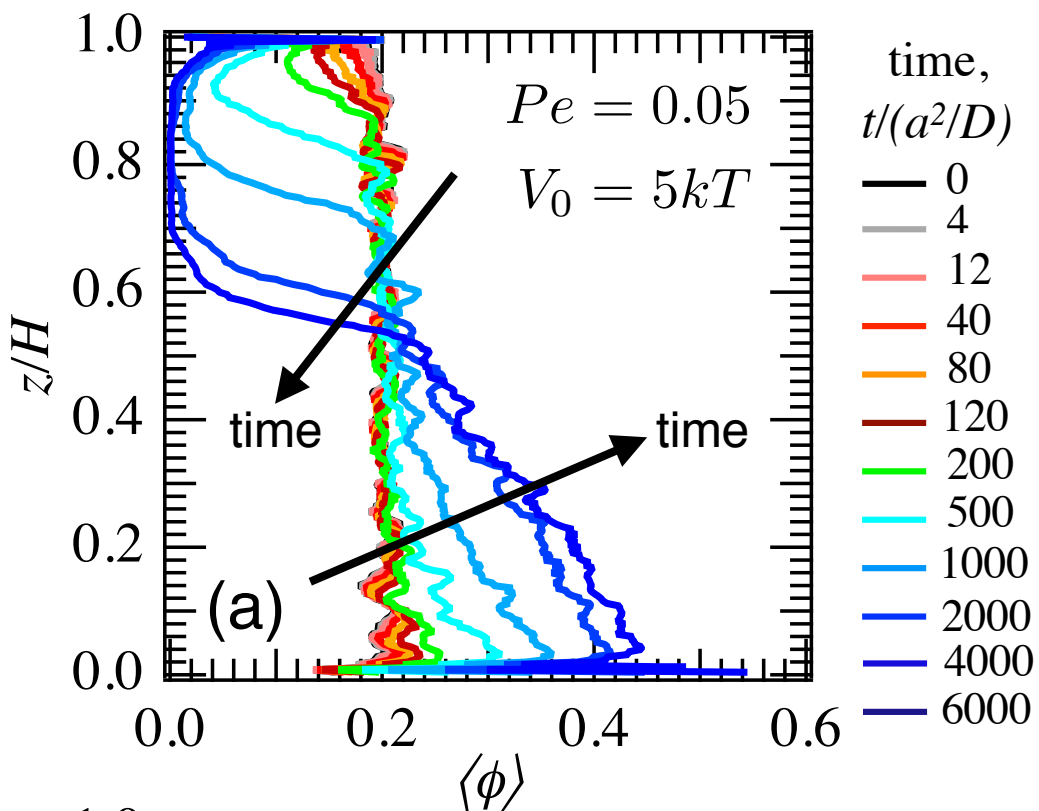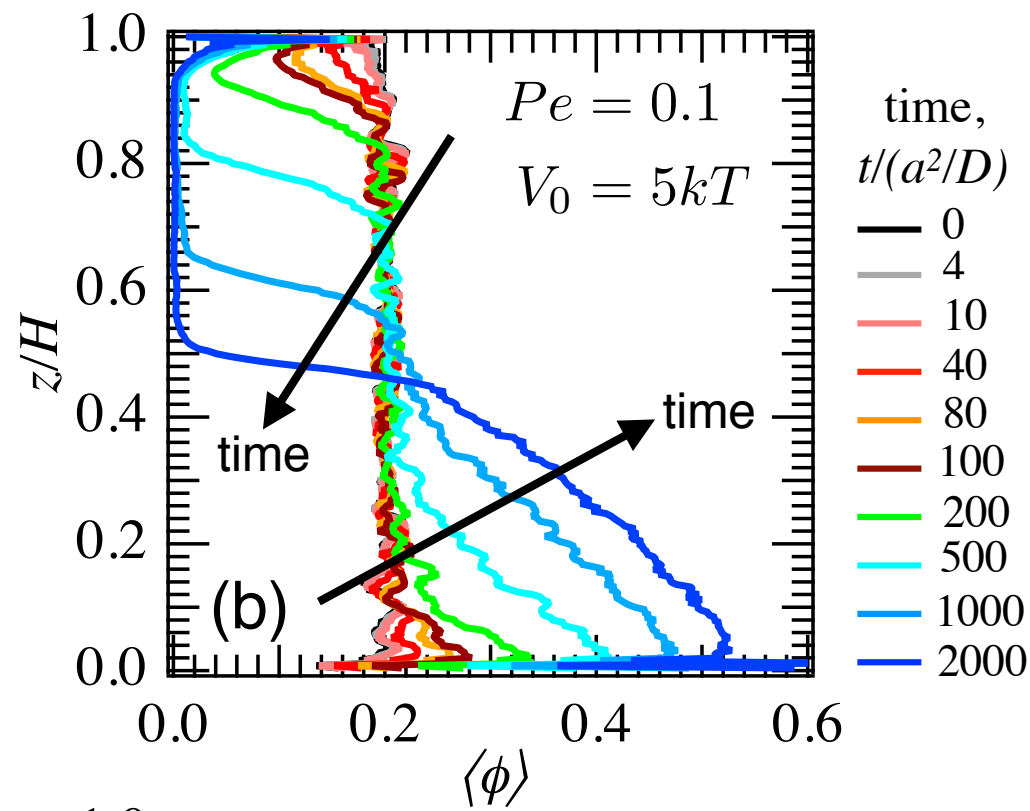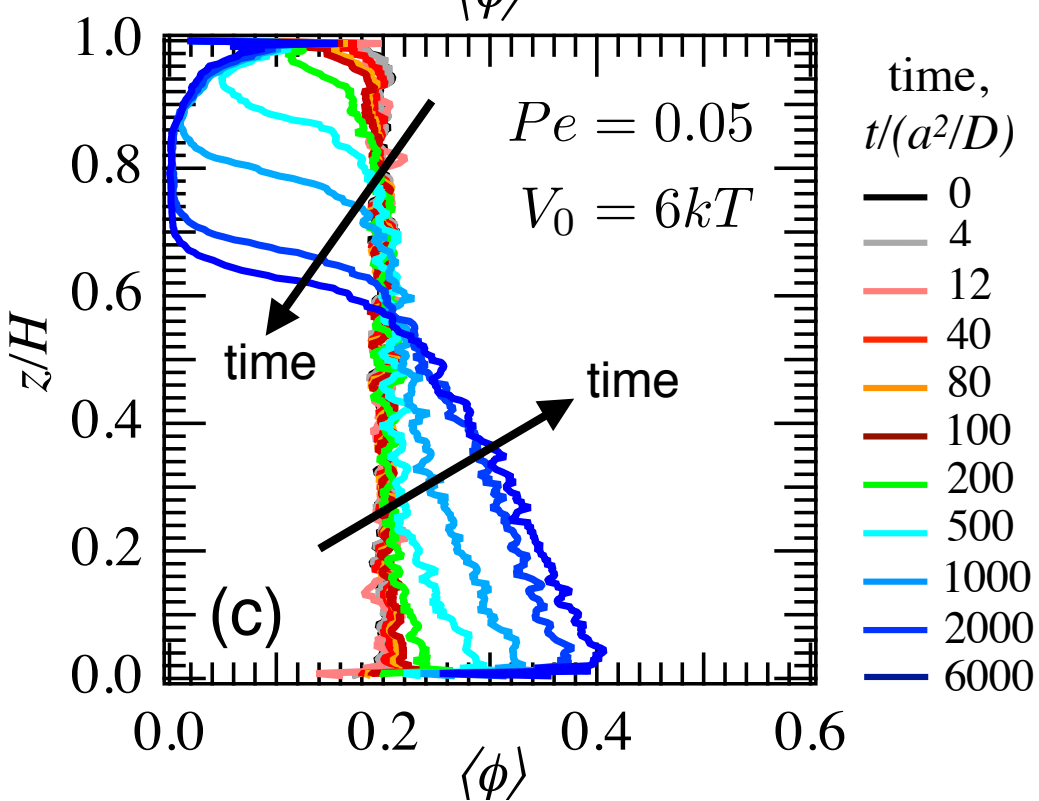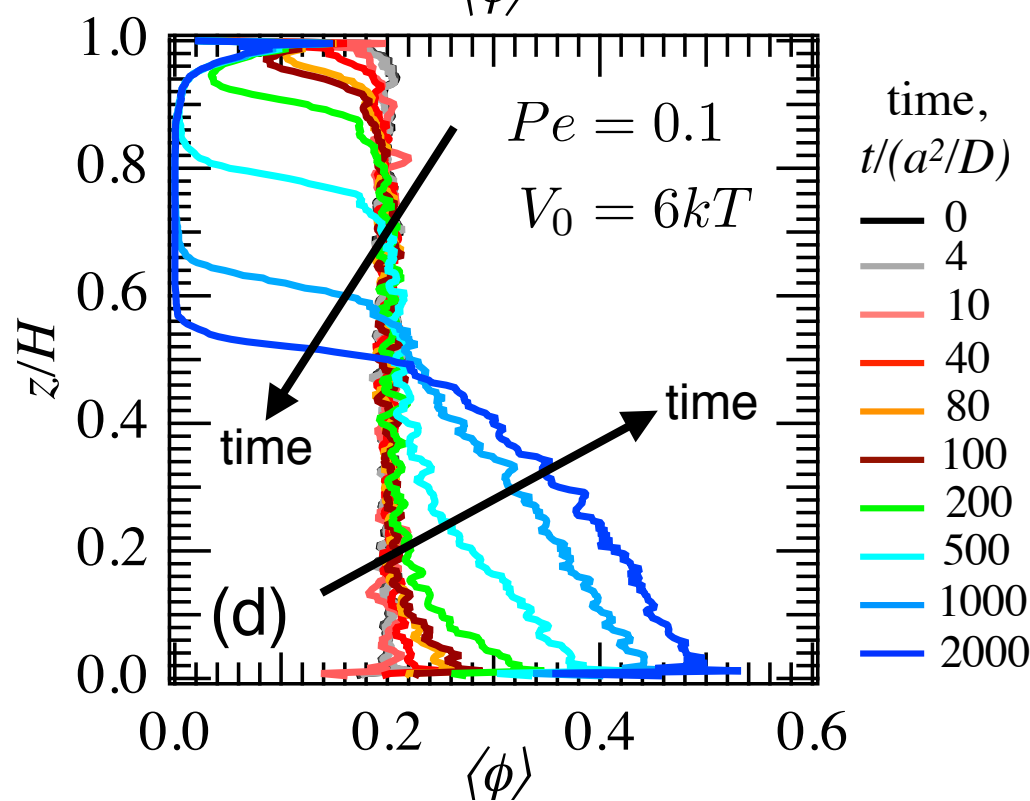

Supplement: c8sm00002f1.zip [file c8sm00002f1.zip]
